# Supplementary material for: Targeted Expression of miR-7 Operated by TTF-1 Promoter Inhibited the Growth of Human Lung Cancer through the NDUFA4 Pathway
Source: PubMed Central journal article supplement (PMC5363496; doi:10.1016/j.omtn.2016.12.005), 2016-12-31
Supplement: mmc1.pdf [file mmc1.pdf]

OMTN, Volume 6

## **Supplemental Information**

### **Targeted Expression of miR-7 Operated by TTF-1 Promoter Inhibited the Growth of Human Lung Cancer through the NDUFA4 Pathway**

**Liangyu Lei, Chao Chen, Juanjuan Zhao, HaiRong Wang, Mengmeng Guo, Ya  
Zhou, Junming Luo, Jidong Zhang, and Lin Xu**

## **Material and methods**

### **Construction of eukaryotic vector**

The gene for the miR-7 (NM-407044) were expanded by PCR from human DNA derived from 95D cells using a forward primer (5'-CGACGCGTAAGAGAGAAATGAGCCACTTGC) and a reverse primer (5'-CCCAAGCTTCCTGCCACAGTGGGGGATG) and then subcloned into and *Mul I* and *HindIII* sites of pGL3.0 basic vector (Invitrogen Corp, San Diego, California, USA) to generate pGL3.0- basic-miR-7 vector (termed as p-miR-7). Afterwards, for the construction of the PGL3-basic-TTF-1-promoter-miR-7(termed as p-T-miR-7) vector, the promoter region of TTF-1 (NM-7080) was amplified from DNA derived from 95D cells using a forward primer (5'-CGGGGTACCTGTTTCGGCAACTAC) and a reverse primer (5'-CGACGCGTCCTTCT-GGGTCCTT) and subcloned into *KpnI* and *Mul I* sites of p-miR-7 vector. Clone identity was verified using restriction digest analysis and plasmid DNA sequencing. Endotoxin-free plasmids were obtained using Endofree plasmid mega kit (QIAGEN GmbH, Hilden, Germany). Then, plasmids were transiently transferred into the 95D cells using Lipofectamine-2000 (Invitrogen) in different following experiments according to the manufacturer's instruction.

### **Real-time PCR assay**

6 organs and tissues, including heart, liver, spleen, kidney, brain, and lymph nodes were collected from nude mice lung cancer model. DNAs were purified from 100 mg these indicated organs or tissues respectively. The primers were obtained from Shanghai Sangon Biological Engineering CO, and the other reagents were from TAKARA Bio Inc. Real-time PCR were performed according to the manufacturer's protocols. The following primers were used: forward:5'-AAGCCTCTTTTTTCGTGGAAGT-3',reverse:5'-GGTTGGGCAGATTTTGAATG3' Plasmid copies were quantified using the BIO-RAD CFX96 detection system (Bio-Rad Laboratories). Relative expression was calculated using the comparative threshold cycle (Ct) method. The copies of plasmid were calculated as previously description<sup>1,2</sup>.

### **Statistical analyses**

The data were analyzed with GraphPad Prism 5.0 and were presented as the mean  $\pm$  SD. Student's t-test was used when two conditions were compared. Probability values of  $<0.05$  were considered significant; two-sided tests were performed.

**Supplementary figure S1**

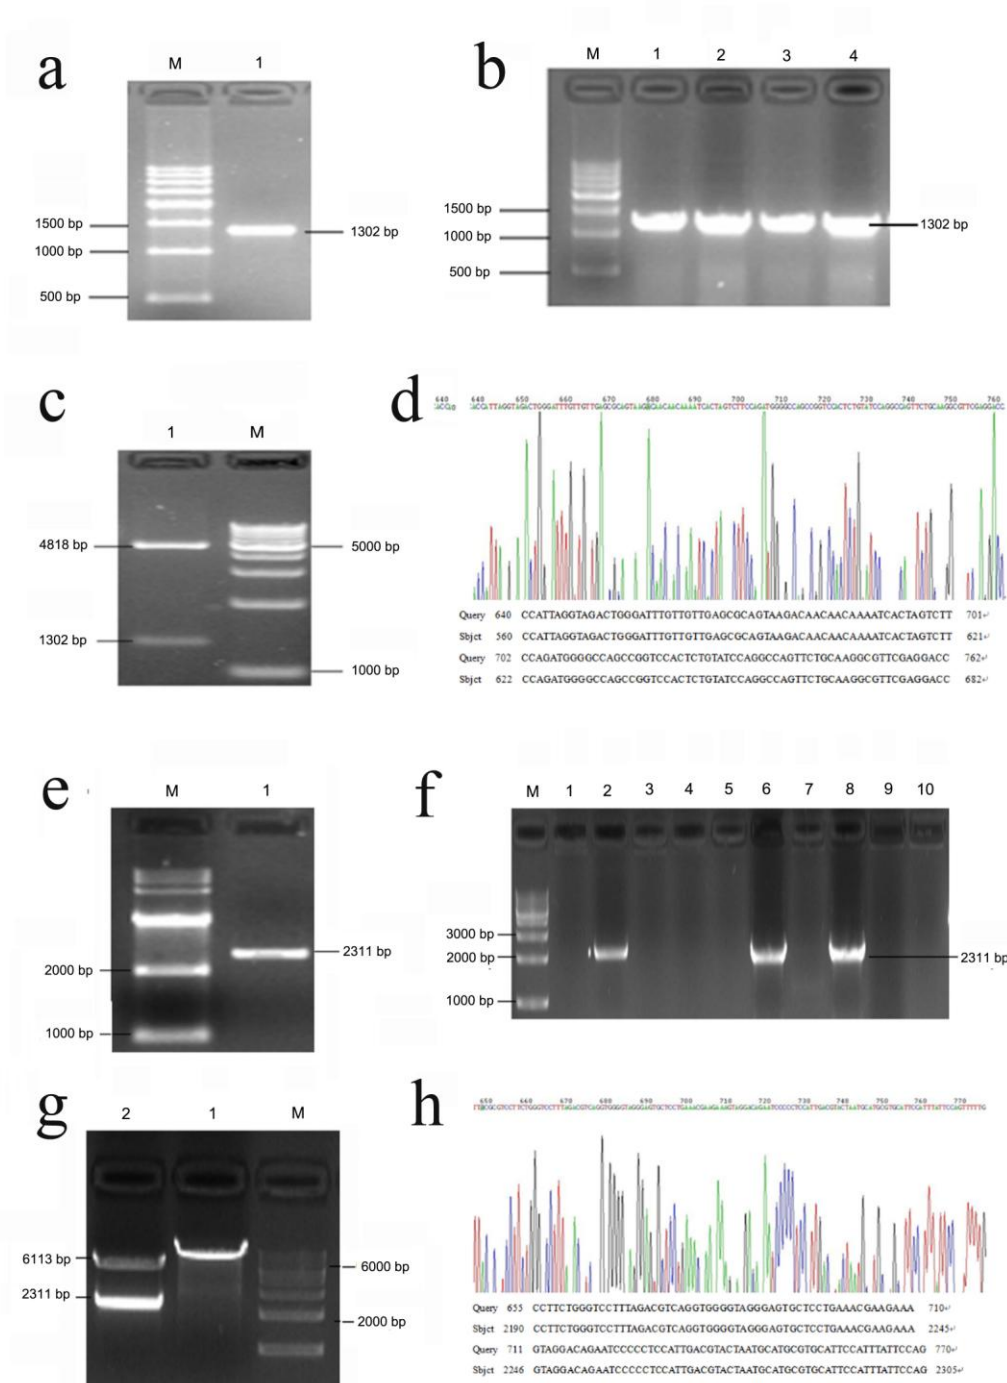

**Supplement figure S1. The construction of plasmid p-T-miR-7.**

miR-7 sequence were amplified from DNA derived from human lung cancer 95D cells by PCR, and then subcloned into pGL3.0 basic vector by restriction site of *Mul I* and *HindIII*. (a)The electrophoresis of pri-miR-7 (1302 bp) amplified from DNA by PCR. (b) The electrophoresis of PCR products of bacterium solution; 1-4: Electrophoresis of different PCR products; M: Marker; Identification of p-miR-7 plasmid by *Mul I* and *HindIII* double digestion(c) and sequencing (d). Then, 95D cells genomic DNA was used as template, TTF-1 promoter sequence was amplified by

PCR assay, and then cloned into p-miR-7 vector by restriction site of *Kpn I* and *Mul I* to construct PGL3.0-basic(-)-TTF-1-promoter-pri-miR-7(termed as p-T-miR-7). (e) The electrophoresis of PCR products of TTF-1 promoter (2311 bp) from the DNA. (f) The electrophoresis of PCR products of bacterium solution; 2,6,8: Electrophoresis of different PCR products; M: Marker; Identification of p-T-miR-7 plasmid by *Kpn I* and *Mul I* double digestion (g) and sequencing (h).

## Supplementary figure S2

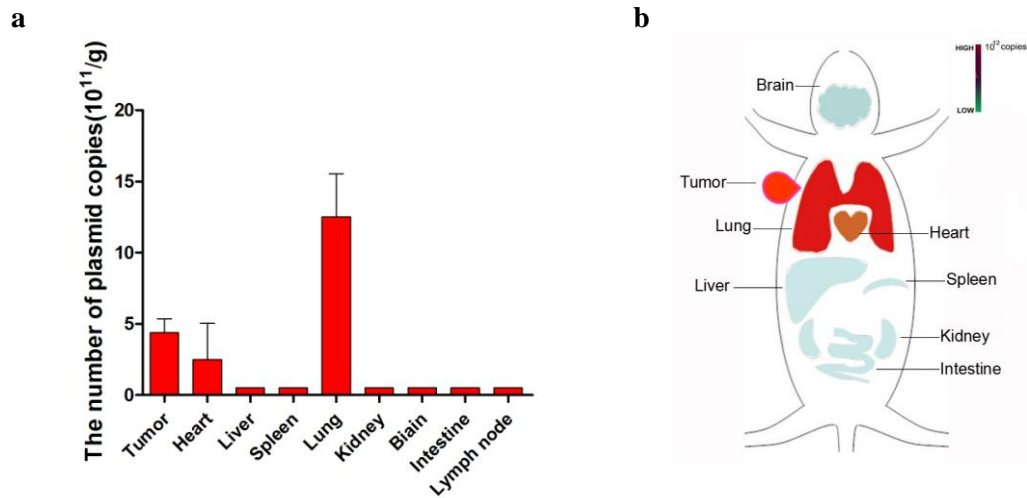

### Supplement figure S2. The plasmid copy number in the main organs and tissues.

Human lung cancer cell line 95D cells were injected subcutaneously into right flank of Balb/c nude mice (n=8). 7 days later, the plasmid of p-T-miR-7(100mg) was remote given by subcutaneous injection into the left flank of nude five times every three days. 3 days after last injection, all of the mice were sacrificed and vital organs including heart, liver, spleen, kidney, brain and lymph node were harvested. The indicated DNA was purified and used for the calculation of plasmid copy number by Realtime PCR assay. **(a)** The data showed copies of plasmid in per gram organs or tissues. **(b)** The sketch map of distribution of plasmid.

### Supplementary figure S3

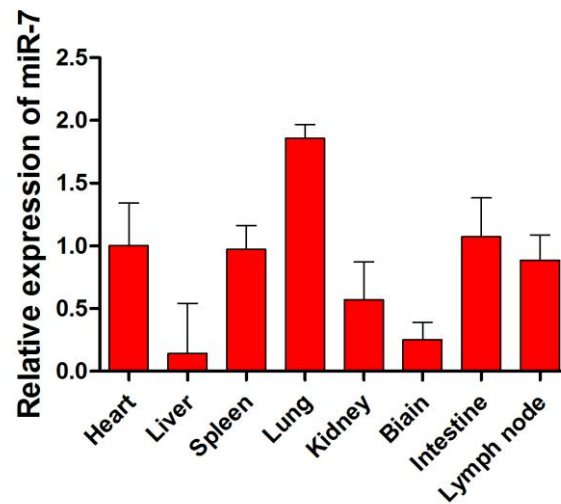

#### Supplement figure S3. The relative expression of miR-7.

Human lung cancer cell line 95D cells were injected subcutaneously into right flank of Balb/c nude mice (n=8). 7 days later, the plasmid of p-T-miR-7 (100mg) was remote given by subcutaneous injection into the left flank of nude five times every three days. 3 days after last injection, all of the mice were sacrificed and vital organs including heart, liver, spleen, kidney, brain and lymph node were harvested. Then, the relative expression level of miR-7 was analyzed by Realtime PCR assay. All data was normalized to heart.

## Reference

[1] Ashty, S, Karim, Kathleen, A, Curran, Hal, S and Alper (2013). Characterization of plasmid burden and copy number in *Saccharomyces cerevisiae* for optimization of metabolic engineering applications. *FEMS Yeast Res* **13**:10.

[2]Yeon, Jeong, Son, Ae, Jin, Ryu, Ling, Li, Nam, Soo, Han and Ki, Jun, Jeong (2016). Development of a high-copy plasmid for enhanced production of recombinant proteins in *Leuconostoc citreum*. *Microb Cell Fact* **15**: 12.

**Table S1. Over 4-fold down-regulation genes (534) in p-T-miR-7 injection group.**

| Traget gene  | Fold change | Traget gene  | Fold change | Traget gene | Fold change |
|--------------|-------------|--------------|-------------|-------------|-------------|
| RB1CC1       | 4.0004811   | KIAA1244     | 4.3466776   | FAM69A      | 5.0351474   |
| ALDH7A1      | 4.0035322   | lnc-CX3CR1-2 | 4.347025    | ZCCHC6      | 5.0364891   |
| AP1S1        | 4.0044539   | MON2         | 4.3480297   | GPAM        | 5.0369814   |
| PAPOLG       | 4.004946    | PALLD        | 4.3481575   | RNA28S5     | 5.0640583   |
| UEVLD        | 4.0079483   | MAP9         | 4.3607582   | GCLC        | 5.0918372   |
| SLC39A1      | 4.0090386   | C12orf29     | 4.3639462   | GABPA       | 5.0993487   |
| NMI          | 4.0091356   | TXNDC9       | 4.3662175   | CYP2U1      | 5.1121462   |
| CD58         | 4.0093295   | AKAP11       | 4.3671588   | CRIM1       | 5.1124853   |
| SLC39A8      | 4.0100366   | MAP1B        | 4.376923    | TIGD6       | 5.1163448   |
| TMX1         | 4.0109195   | PPAT         | 4.3782198   | HAUS2       | 5.1170073   |
| CBR1         | 4.0120512   | MRPL12       | 4.3803404   | TMEM14C     | 5.1240303   |
| LOC100128593 | 4.0133117   | PWWP2A       | 4.3838201   | BDNF        | 5.1315089   |
| TOP1         | 4.015285    | RFK          | 4.3878679   | MED21       | 5.1360545   |
| ZFH4-AS1     | 4.0230624   | UQCRH        | 4.388114    | NR3C1       | 5.146776    |
| NAP1L4       | 4.0232364   | TMEM206      | 4.3922516   | FERMT1      | 5.1558826   |
| DBF4         | 4.0236271   | CNTD1        | 4.3927378   | HBS1L       | 5.1585811   |
| SGTB         | 4.0239367   | ITFG1        | 4.3932113   | AAED1       | 5.1615272   |
| RNF213       | 4.0284339   | CHCHD1       | 4.3948106   | KPNA5       | 5.1650421   |
| SAR1A        | 4.0286054   | CAMLG        | 4.3951567   | GALNT1      | 5.1791394   |
| DNAJC8       | 4.0332463   | CYCS         | 4.3995574   | TUBB        | 5.1866571   |
| DNAJC19      | 4.0386166   | RPS15A       | 4.3998002   | SEPT7       | 5.1869616   |
| TERF1        | 4.0394778   | RPS29        | 4.4044809   | CCNT2       | 5.2006523   |
| ANKRD46      | 4.0457504   | YEATS4       | 4.4079015   | UQCR11      | 5.2015659   |
| SLC38A1      | 4.0486763   | FAM169A      | 4.4106598   | SIKE1       | 5.2101204   |
| ZNF226       | 4.0527034   | SHMT2        | 4.4131672   | PRR3        | 5.2141027   |
| BID          | 4.055145    | SNRPG        | 4.4145549   | MOB4        | 5.2148205   |
| PDGFRL       | 4.0564638   | FAM105A      | 4.4182045   | TTK         | 5.2190166   |
| SCAMP1       | 4.058141    | PDIA3        | 4.424181    | ADAT2       | 5.220592    |
| SDHD         | 4.0639397   | TAF13        | 4.4394101   | LARP1B      | 5.2320448   |
| IFIT5        | 4.0648252   | SPCS2        | 4.4418464   | XRCC6BP1    | 5.2335359   |
| ALDH9A1      | 4.0701304   | COPS8        | 4.442077    | EPC1        | 5.2382358   |
| CDH11        | 4.0715886   | CLGN         | 4.4430941   | PFN2        | 5.2403312   |
| OSTF1        | 4.0752117   | LIMA1        | 4.4503719   | TPK1        | 5.2438936   |
| YIPF5        | 4.0770612   | ZBTB41       | 4.4625722   | ASXL3       | 5.2496127   |
| PHYHIPL      | 4.0779565   | ARPP19       | 4.4644115   | LAMP2       | 5.2499006   |
| PDE12        | 4.0805881   | MRPL14       | 4.4652285   | TUBE1       | 5.2602505   |
| CKS2         | 4.0824183   | GGCX         | 4.4665874   | ZNF396      | 5.2811016   |
| LINC00597    | 4.0828569   | SERPINB9     | 4.4700492   | PTAR1       | 5.3097543   |
| SNRPE        | 4.084074    | DENND1B      | 4.4721761   | PLA2G4A     | 5.3204708   |
| MIR155HG     | 4.0867279   | PLSCR4       | 4.4723237   | SRP72       | 5.3227264   |
| RNF2         | 4.0883735   | NRIP1        | 4.4746592   | MRPL13      | 5.3232193   |
| DTD1         | 4.0924534   | TMED2        | 4.476276    | BID         | 5.3360282   |
| C11orf58     | 4.0958997   | MYCL         | 4.4764054   | ARL5B       | 5.3383445   |
| NCAM2        | 4.0968952   | DPY19L2P2    | 4.4819607   | GDI2        | 5.3388718   |
| CDK1         | 4.0976521   | TSNAX        | 4.4825066   | KIF20B      | 5.3422926   |
| NAA15        | 4.100482    | TMEM126A     | 4.4842695   | PLAC8       | 5.3463712   |
| REEP3        | 4.1006181   | PFDN4        | 4.4843814   | FAM127C     | 5.3473199   |
| ANG          | 4.101393    | LINC00944    | 4.4935844   | ALCAM       | 5.3509365   |
| EAF2         | 4.101824    | EPHA7        | 4.5006863   | TMTC3       | 5.3733838   |
| SETD7        | 4.1029706   | GPR126       | 4.5015162   | HSD17B11    | 5.3752394   |
| ZNF254       | 4.1030846   | COMMD10      | 4.5061302   | MRPL12      | 5.3907821   |
| KBTBD3       | 4.103441    | PTGIS        | 4.5075934   | TRUB1       | 5.3974826   |
| PEX3         | 4.1053294   | USP37        | 4.5104582   | ANKRD31     | 5.4167143   |
| IER3IP1      | 4.1110485   | FUOM         | 4.5122925   | DNM1L       | 5.425204    |
| EPM2AIP1     | 4.1110499   | HIAT1        | 4.5141489   | OSTM1       | 5.4316605   |
| GNPDA2       | 4.1119223   | POLR1B       | 4.5143085   | SNORA53     | 5.4380145   |
| P2RY2        | 4.1133345   | SLC7A11      | 4.5145901   | C6orf57     | 5.4441899   |
| HSP90AA1     | 4.1143628   | NANP         | 4.5150971   | KIF21A      | 5.4677868   |



Continued

| Trget gene | Fold change | Trget gene | Fold change | Trget gene   | Fold change |
|------------|-------------|------------|-------------|--------------|-------------|
| MCU        | 4.1149503   | NDUFB6     | 4.5160548   | PLS3         | 5.4695836   |
| KIAA0825   | 4.1199685   | LAMTOR3    | 4.5209263   | BMPR2        | 5.4854744   |
| RNU12      | 4.1214757   | LRRIQ3     | 4.522189    | SLC25A46     | 5.4916683   |
| C10orf32   | 4.1260843   | CASC5      | 4.5258802   | RGS5         | 5.5015849   |
| SLC35E3    | 4.1271017   | SPECC1     | 4.5363288   | AREG         | 5.502504    |
| RAB8B      | 4.1273489   | NUP98      | 4.5376596   | LOH12CR1     | 5.5064992   |
| HACL1      | 4.1274078   | DR1        | 4.5404356   | CCDC132      | 5.5348047   |
| PIGP       | 4.1293554   | KLHL7      | 4.5413631   | TOR1AIP2     | 5.5424099   |
| ZNF678     | 4.1308965   | CENPA      | 4.5511199   | NUP37        | 5.5868396   |
| SLC16A1    | 4.132257    | ENPP1      | 4.5550251   | PJA2         | 5.5926227   |
| TAB3       | 4.1323418   | GALC       | 4.5575737   | NUDT14       | 5.5959951   |
| NDUFA4     | 4.1337181   | ISOC1      | 4.5584078   | SEL1L        | 5.6111108   |
| RPS15A     | 4.1353258   | SNORA23    | 4.5589766   | RBM43        | 5.6274499   |
| NDUFA11    | 4.141982    | GSKIP      | 4.5606675   | SLC31A1      | 5.6392426   |
| KCTD12     | 4.1436553   | SEC24D     | 4.5629603   | MLF1         | 5.6467509   |
| METTL21B   | 4.1471792   | CASP8      | 4.568781    | NT5DC1       | 5.6498732   |
| SELT       | 4.1473184   | KRIT1      | 4.5727226   | GPR22        | 5.6614947   |
| ZNF91      | 4.1491804   | CMC1       | 4.5761806   | MCTP1        | 5.6621442   |
| CRYZ       | 4.1508661   | PPIL1      | 4.5788554   | SLC10A4      | 5.6690017   |
| HSPA13     | 4.1542931   | PIGK       | 4.5803537   | HAVCR2       | 5.6755519   |
| CTBS       | 4.1547962   | CLDN1      | 4.581701    | SHROOM3      | 5.6941914   |
| THAP2      | 4.1576396   | LYPLA1     | 4.5866938   | TMED7-TICAM2 | 5.6985703   |
| CCNB1      | 4.1589144   | ST8SIA4    | 4.6039941   | TMEM14A      | 5.7072292   |
| DNAJC19    | 4.1597246   | SLC25A46   | 4.6074257   | OTUD6B       | 5.7202992   |
| CANX       | 4.159835    | BAG2       | 4.6101702   | NAT1         | 5.7249199   |
| CACYBP     | 4.1659427   | SELT       | 4.6131609   | CAP2         | 5.7308741   |
| NPAT       | 4.1670332   | NXT2       | 4.6160697   | NLGN1        | 5.7317342   |
| TCF12      | 4.1672539   | UFM1       | 4.6193697   | ANTXR1       | 5.7548128   |
| BMPR1A     | 4.1708968   | PRNP       | 4.6195586   | RPL26L1      | 5.8384402   |
| ESD        | 4.1715513   | MDH1       | 4.6213809   | RRM1         | 5.8552388   |
| STRN       | 4.1770621   | B9D1       | 4.6237785   | GATC         | 5.8761198   |
| GPR180     | 4.1788228   | SMAD1      | 4.6240196   | NQO1         | 5.9320905   |
| RPL39      | 4.1791311   | DSG2       | 4.6247424   | HSPA4L       | 5.9581465   |
| DHCR24     | 4.179696    | P2RY1      | 4.6274686   | C17orf104    | 5.9605328   |
| RPL13AP3   | 4.1799596   | ARL6IP5    | 4.6354757   | HSD17B7      | 5.9710183   |
| COX16      | 4.1827797   | CRYZ       | 4.6441449   | DBF4         | 5.9711909   |
| TMEM123    | 4.183914    | E2F7       | 4.64554     | CKS1B        | 5.983232    |
| SPRYD7     | 4.186569    | DPH3       | 4.6482511   | BBS10        | 6.0043955   |
| TSPAN12    | 4.1873172   | FLJ40536   | 4.6486787   | KBTD7        | 6.0282239   |
| RBBP4      | 4.1899761   | SNRPE      | 4.6501975   | ZNF705A      | 6.0626553   |
| LOC389831  | 4.193213    | PHACTR2    | 4.6504119   | MRPL42       | 6.0695729   |
| TFPI       | 4.1939812   | SPOCK3     | 4.6589337   | FSIP2        | 6.0978772   |
| TMTC2      | 4.1949058   | PTPLAD1    | 4.665446    | ATP5C1       | 6.1184024   |
| SAP30      | 4.2004256   | CHMP5      | 4.6710449   | ATP7A        | 6.1240379   |
| PCDHB9     | 4.2031674   | SELM       | 4.675796    | PIGK         | 6.1493874   |
| CCDC186    | 4.2054809   | TMLHE      | 4.6761182   | TMEM38B      | 6.1752652   |
| DDB1       | 4.2067235   | PYROXD1    | 4.6780533   | GLS          | 6.17571     |
| LCOR       | 4.2068361   | TMED5      | 4.6804946   | SNORA59B     | 6.2214433   |
| HLTF       | 4.2111667   | TMEM14C    | 4.6810624   | MRPS14       | 6.2243794   |
| QSER1      | 4.2112339   | PHF5A      | 4.6833621   | FAHD1        | 6.2329166   |
| TERF1      | 4.2162763   | LAMTOR5    | 4.6841166   | CHRNA5       | 6.2700446   |
| SEN7       | 4.218407    | SQRDL      | 4.6841426   | ATP7A        | 6.2799497   |
| IL6ST      | 4.2202311   | TP53       | 4.6842024   | WDFY3        | 6.29795     |
| DACH1      | 4.2213861   | LSM3       | 4.6865556   | HHEX         | 6.3054372   |
| EMB        | 4.2226185   | CCDC121    | 4.689615    | POMP         | 6.3258178   |
| CLN5       | 4.2234501   | DEF8       | 4.6917625   | ESCO2        | 6.3962361   |
| UTY        | 4.2242037   | IL7        | 4.7021645   | ARHGAP18     | 6.3977814   |
| PSMA4      | 4.2264928   | EPS8       | 4.7160228   | ACSL3        | 6.4274055   |
| SPIN4      | 4.2290218   | C2orf88    | 4.7167682   | GOLT1B       | 6.4374334   |
| SLC39A9    | 4.2296934   | COX5A      | 4.7227494   | PPM1A        | 6.4660022   |

Continued

| Trget gene | Fold change | Trget gene   | Fold change | Trget gene | Fold change |
|------------|-------------|--------------|-------------|------------|-------------|
| TROVE2     | 4.2302414   | PLAA         | 4.7274638   | CSRN1      | 6.480614    |
| FLJ10038   | 4.2308748   | SNRPE        | 4.7282293   | TRMT1L     | 6.4819729   |
| UBLCP1     | 4.2348416   | HOMER1       | 4.7323212   | SGOL2      | 6.4859235   |
| LEPR       | 4.2356671   | SEP15        | 4.7327345   | PLCB1      | 6.5323469   |
| SMIM11     | 4.2359689   | CHD9         | 4.7368162   | CTSO       | 6.5413568   |
| INPP4B     | 4.2373001   | NDUFA13      | 4.7436218   | SLC39A10   | 6.5608808   |
| CLIC4      | 4.2375494   | NID2         | 4.7440493   | TMEM14B    | 6.5609558   |
| LINC01503  | 4.2381778   | DLEU2L       | 4.7860352   | AHR        | 6.5813781   |
| LYPLAL1    | 4.2397538   | FKBP14       | 4.7885438   | TMEM106B   | 6.5843421   |
| FCF1       | 4.2402255   | KCNG3        | 4.7889504   | EDEM3      | 6.6796888   |
| ZNF720     | 4.2442855   | MREG         | 4.7917764   | C8orf88    | 6.7013572   |
| TP53TG1    | 4.2477139   | CROT         | 4.7921896   | CPE        | 6.7260197   |
| STXBP4     | 4.2496647   | COMMD8       | 4.8076684   | BPNT1      | 6.82355     |
| ATXN10     | 4.2500214   | PPM1L        | 4.8147277   | DNAJC6     | 6.8529302   |
| PHYH       | 4.2522093   | OSBPL8       | 4.8157033   | ERAP1      | 6.8606582   |
| C2orf73    | 4.2527894   | IL6ST        | 4.8157941   | LMBR1      | 6.9024953   |
| AARD       | 4.2531042   | MRPL54       | 4.8167642   | LEPROT     | 6.9424631   |
| ZDHHC20    | 4.254398    | SLC30A6      | 4.8176884   | CHMP2B     | 7.0466424   |
| ARSK       | 4.255253    | CTDSPL2      | 4.8195929   | MRPL1      | 7.0622143   |
| GABARAPL1  | 4.2564468   | MDH1         | 4.8278505   | GULP1      | 7.073793    |
| ITGB3      | 4.2582156   | WDFY1        | 4.8299183   | TMTC3      | 7.0817602   |
| HOXA13     | 4.2586643   | SDHD         | 4.8306174   | TMPO       | 7.1223632   |
| TM2D1      | 4.2597374   | ELMOD2       | 4.8370351   | SULT2B1    | 7.1726145   |
| PAK2       | 4.2599072   | GSTO1        | 4.8399797   | ITGA4      | 7.268674    |
| TSPAN14    | 4.2609969   | FNIP1        | 4.8441314   | PLS1       | 7.2696419   |
| PIGN       | 4.2615297   | COL8A1       | 4.8548795   | NUDCD1     | 7.3693532   |
| GABPB1     | 4.263449    | POT1         | 4.8595917   | C11orf58   | 7.4399344   |
| HNRNPCL1   | 4.2655359   | GULP1        | 4.8646287   | CHCHD2     | 7.4777539   |
| BIK        | 4.2656352   | GSR          | 4.8659598   | CAPN7      | 7.5704807   |
| ITGAV      | 4.2692422   | PTN          | 4.8729043   | TRMT10A    | 7.5948838   |
| POLR3G     | 4.2712964   | SEC23A       | 4.8737694   | MANEA      | 7.7068136   |
| UQCRH      | 4.2724452   | C15orf8      | 4.8746208   | BFSP2      | 7.7398328   |
| TIPARP     | 4.2737911   | C11orf70     | 4.8765069   | CNRIP1     | 8.1045889   |
| SFMBT2     | 4.2762571   | LINC01300    | 4.8774409   | LRP12      | 8.1352462   |
| HS2ST1     | 4.2815999   | MRPS28       | 4.8954518   | FGF12      | 8.1820253   |
| SPINT2     | 4.2816655   | CNIH1        | 4.8976681   | RBM24      | 8.2989781   |
| HIST1H4A   | 4.2816712   | MGST3        | 4.9045882   | FZD7       | 8.3067556   |
| C2orf76    | 4.2841254   | UMAD1        | 4.9051559   | PRKACB     | 8.3318271   |
| CERS6      | 4.2866006   | CMTM6        | 4.9155563   | TMEM17     | 8.383965    |
| CASP3      | 4.2956129   | TUBB         | 4.9252829   | PHF14      | 8.3991539   |
| SNRPG      | 4.2985855   | FBXO22       | 4.9300323   | EDIL3      | 8.6604477   |
| SSX2IP     | 4.300463    | TMEM56       | 4.9309205   | TMEM106B   | 8.8020953   |
| DTWD1      | 4.3004934   | HOOK3        | 4.9451459   | TLE4       | 8.8432238   |
| ARL6IP1    | 4.3044443   | DPH6         | 4.9558403   | ACAP2      | 8.9732276   |
| DLEU2L     | 4.3053335   | HINT1        | 4.9558448   | ATP6V1C2   | 8.9737867   |
| PGM2       | 4.3055126   | LOC100131048 | 4.9653899   | FAM171B    | 9.0195703   |
| NAPEPLD    | 4.3063692   | LZTFL1       | 4.9710741   | AKAP9      | 9.4973986   |
| TMEM135    | 4.3069811   | EIF5A2       | 4.9745703   | RBBP9      | 9.5211247   |
| PDLIM3     | 4.307655    | C1QBP        | 4.9775679   | PIGM       | 9.6391839   |
| COMMD6     | 4.3084771   | DUSP19       | 4.9913532   | TMSB15A    | 9.6602271   |
| PARVA      | 4.3094845   | PRRC1        | 4.9961899   | FAM198B    | 9.6818188   |
| ECHDC1     | 4.3106248   | RPA3         | 5.0036886   | SLC30A7    | 9.805271    |
| GPX8       | 4.315794    | JAZF1        | 5.00808     | GTF3C3     | 10.02813    |
| ZC3HAV1    | 4.3208603   | METTL20      | 5.0131701   | DNAJB9     | 10.1163125  |
| VPS41      | 4.3261302   | SNRPG        | 5.015446    | FSTL5      | 10.1447092  |
| PCYOX1     | 4.3275065   | SIVA1        | 5.0180401   | CDC73      | 11.4744763  |
| ZHX1       | 4.3312805   | ARHGAP5      | 5.0198237   | C17orf104  | 11.9460056  |
| C3orf58    | 4.3333552   | LAMP3        | 5.0213473   | TMEM38B    | 13.1177293  |
| ANLN       | 4.339484    | DEPDC1       | 5.0233208   | XK         | 15.5924897  |
| TMEM19     | 4.3415554   | CD302        | 5.0273091   | HIST1H4C   | 15.6153013  |
